# Supplementary material
Source: publisher site journal article supplement (https://www.dovepress.com/get_supplementary_file.php?f=355772.docx)
Supplement: Supplementary file 1 [file get_supplementary_file.php]

**Low Peak Inspiratory Flow Rates are Common Among COPD Inpatients and are Associated with Increased Healthcare Resource Utilization: A Retrospective Cohort Study**

**Authors**

Brendan Clark, Brian J Wells, Amit K Saha, Jessica Franchino-Elder, Asif Shaikh, Bonnie MK Donato, and Jill A Ohar

**Supplemental material**

**Table S1**. ICD-9/10-CM Codes

|  | **ICD-9-CM Code** | **ICD-10-CM Code** |
| --- | --- | --- |
| **AECOPD case definition** | | |
| Primary diagnosis of one of the following | 491.21, 491.22, 491.8, 492.8, 491.9, 493.2, 493.21, 493.22, 496 | J44.1, J44.0, J41.8, J43.9, J42, J44.0, J44.1, J44.9 |
| **OR** | | |
| Primary diagnosis of respiratory failure | 518.81, 518.82, 518.84, 799.1 | J96.00, J96.90, J80, J96.20, R09.2 |
| **AND** | | |
| Secondary diagnosis of AECOPD | 491.21, 491.22, 493.21, 493.22 | J44.1, J44.0 |
| **Pneumonia case definition** | | |
| Primary admitting diagnosis of pneumonia |  | J69.0, A48.1, J09.X1, J10.00, J10.01, J10.08, J11.00, J11.08, J12.0, J12.1, J12.2, J12.3, J12.81, J12.89, J12.9, J13, J14, J15.0, J15.1, J15.20, J15.211, J15.212, J15.29, J15.3, J15.4, J15.5, J15.6, J15.7, J15.8, J15.9, J16.0, J16.8, J18.0, J18.1, J18.8, J18.9 |
| **OR** | | |
| Primary admitting diagnosis of one of the following |  | A02.1, A22.7, A26.7, A32.7, A40.0, A40.1, A40.3, A40.8, A40.9, A41.01, A41.02, A41.1, A41.2, A41.3, A41.4, A41.50, A41.51, A41.52, A41.53, A41.59, A41.81, A41.89, A41.9, A42.7, A54.86, B37.7, T81.44XA, T81.44XD, T81.44XS |
| **AND** | | |
| Secondary diagnosis code of pneumonia (listed above) that is present on admission and no secondary diagnoses of severe sepsis present on admission |  | R65.20, R65.21 |
| **Other ICD codes** | | |
| Cystic fibrosis | 277.0x | E84.x |
| Alpha-1 antitrypsin deficiency | 273.4 | E88.01 |

**Abbreviations:** AECOPD, acute exacerbation of chronic obstructive pulmonary disease; ICD-9/10-CM, International Classification of Diseases 9th/10th revisions - Clinical Modification.

**Table S2**. COPD Medication Prescribed at Discharge from Index Hospitalization by PIF Group

|  | **R-2** | | **R-5** | |
| --- | --- | --- | --- | --- |
|  | **Low PIF**  **< 60 L/min**  **(n = 423)** | **High PIF**  **≥ 60 L/min**  **(n = 320)** | **Low PIF**  **< 30 L/min**  **(n = 109)** | **High PIF**  **≥ 30 L/min**  **(n = 634)** |
| COPD rescue medication class utilization, n (%) |  |  |  |  |
| ≥ 1 SAMA | 50 (11.8) | 28 (8.8) | 23 (21.1) | 55 (8.7) |
| ≥ 1 SABA | 382 (90.3) | 295 (92.2) | 100 (91.7) | 577 (91.0) |
| ≥ 1 SAMA/SABA | 126 (29.8) | 83 (25.9) | 33 (30.3) | 176 (27.8) |
| COPD maintenance medication classes, n (%) |  |  |  |  |
| None | 44 (10.4) | 21 (6.6) | 15 (13.8) | 50 (7.9) |
| ICS monotherapy | 36 (8.51) | 13 (4.06) | 9 (8.26) | 49 (7.73) |
| LAMA monotherapy | 29 (6.86) | 12 (3.75) | 4 (3.67) | 37 (5.84) |
| LABA monotherapy | 2 (0.47) | 0 (0) | 1 (0.92) | 1 (0.16) |
| LAMA/LABA | 18 (4.26) | 28 (8.75) | 5 (4.59) | 41 (6.47) |
| LABA/ICS | 53 (12.53) | 48 (15) | 14 (12.84) | 87 (13.72) |
| LAMA/ICS | 7 (1.7) | 7 (2.2) | 4 (3.7) | 10 (1.6) |
| LAMA/LABA/ICS | 234 (55.32) | 191 (59.69) | 57 (52.29) | 368 (58.04) |
| Any LABA | 330 (78.01) | 259 (80.94) | 84 (77.06) | 505 (79.65) |
| Any LAMA | 288 (68.09) | 238 (74.38) | 70 (64.22) | 456 (71.92) |
| Any ICS | 307 (72.58) | 267 (83.44) | 77 (70.64) | 497 (78.39) |
| COPD maintenance medication inhaler type, n (%) |  |  |  |  |
| ≥ 1 DPI | 268 (63.4) | 220 (68.8) | 63 (57.8) | 425 (67.0) |
| ≥ 1 R-5 resistance DPI | 166 (39.2) | 140 (43.8) | 33 (30.3) | 273 (43.1) |
| ≥ 1 R-2 resistance DPI | 147 (34.8) | 115 (35.9) | 43 (39.4) | 219 (34.5) |

**Abbreviations:** COPD, chronic obstructive pulmonary disease; DPI, dry powder inhaler; ICS, inhaled corticosteroid; LABA, long-acting beta2-agonist; LAMA, long-acting muscarinic antagonist; PIF, peak inspiratory flow; R-2, medium-low resistance; R‑5, high resistance; SABA, short‑acting beta2-agonist; SAMA, short-acting muscarinic antagonist.

**Table S3.** Incidence Rates and Unadjusted and Adjusted IRRs for HRU Outcomes During Follow-up (R-5)

| **Outcomes** | **R-5 Low PIF**  **< 30 L/min Cohort**  **(n = 105)** | | | **R-5 High PIF**  **≥ 30 L/min Cohort**  **(n = 599)** | | |  |  |
| --- | --- | --- | --- | --- | --- | --- | --- | --- |
|  | **No. of Events** | **PY** | **Events/PY** | **No. of Events** | **PY** | **Events/PY** | **IRR Crude (95% CI)** | **Adjusted IRR (95% CI)** |
| All-cause hospitalization | 103 | 72.6 | 1.42 | 534 | 432.5 | 1.23 | 1.15 (0.93–1.41) | 1.2 (0.96–1.5) |
| COPD hospitalization | 51 | 72.6 | 0.70 | 255 | 432.5 | 0.59 | 1.19 (0.87–1.59) | 1.34 (0.97–1.84) |
| COPD or pneumonia hospitalization | 60 | 72.6 | 0.83 | 294 | 432.5 | 0.68 | 1.22 (0.91–1.59) | 1.36 (1.0–1.81) |
| All-cause inpatient days | 590.1 | 72.6 | 8.13 | 2621.7 | 432.5 | 6.06 | 1.34 (1.23–1.47) | 1.3 (1.18–1.43) |
| COPD inpatient days | 313.7 | 72.6 | 4.32 | 1293.5 | 432.5 | 2.99 | 1.45 (1.28–1.63) | 1.46 (1.27–1.67) |
| COPD or pneumonia inpatient days | 352 | 72.6 | 4.85 | 1518.8 | 432.5 | 3.51 | 1.38 (1.23–1.55) | 1.4 (1.23–1.58) |
| All-cause ICU days | 169.2 | 72.6 | 2.33 | 596.9 | 432.5 | 1.38 | 1.2 (1.01–1.42) | 1.38 (1.14–1.66) |
| COPD ICU days | 101.3 | 72.6 | 1.40 | 385.1 | 432.5 | 0.89 | 1.57 (1.25–1.94) | 1.67 (1.31–2.11) |
| COPD or pneumonia ICU days | 109.3 | 72.6 | 1.51 | 428.8 | 432.5 | 0.99 | 1.52 (1.23–1.87) | 1.58 (1.25–1.97) |

**Abbreviations:** CI, confidence interval; COPD, chronic obstructive pulmonary disease; HRU, healthcare resource utilization; ICU, intensive care unit; IRR, incidence risk ratio; PY, person-years; R-5, high resistance.

**Table S4.** Post-index Admission PIFs by Measurement Setting

|  | **All-Cause Readmissions Within 30 Days, n (%)** | **All-Cause Readmissions Within 90 Days, n (%)** | **Pulmonary Clinic Visit Within 14 Days, n (%)** | **Pulmonary Clinic Within 30 Days, n (%)** |
| --- | --- | --- | --- | --- |
| n | 83 | 165 | 144 | 229 |
| PIF R-2 < 60 L/min | 53 (63.86) | 102 (61.82) | 85 (59.03) | 133 (58.08) |
| PIF R-2 ≥ 60 L/min | 30 (36.14) | 63 (38.18) | 59 (40.97) | 96 (41.92) |
| Index PIF R-2 < 60 L/min and post-index PIF R-2 ≥ 60 L/min | 2 (2.41) | 3 (1.82) | 7 (4.86) | 7 (3.06) |
| Index PIF R-2 ≥ 60 L/min and post-index PIF R-2 < 60 L/min | 3 (3.61) | 6 (3.64) | 3 (2.08) | 6 (2.62) |
| PIF R-5 < 30 L/min | 13 (15.66) | 28 (16.97) | 28 (19.44) | 36 (15.72) |
| PIF R-5 ≥ 30 L/min | 70 (84.34) | 137 (83.03) | 116 (80.56) | 193 (84.28) |
| Index PIF R-5 < 30 L/min but post-index PIF R-5 ≥ 30 L/min | 1 (1.20) | 2 (1.21) | 3 (2.08) | 3 (1.31) |
| Index PIF R-5 ≥ 30 L/min and post-index PIF R-5 < 30 L/min | 1 (1.20) | 2 (1.21) | 1 (0.69) | 2 (0.87) |

**Abbreviations:** PIF, peak inspiratory flow; R-2, medium-low resistance; R-5, high resistance.

**Figure S1.** PIF Prevalence During the Index Hospitalization


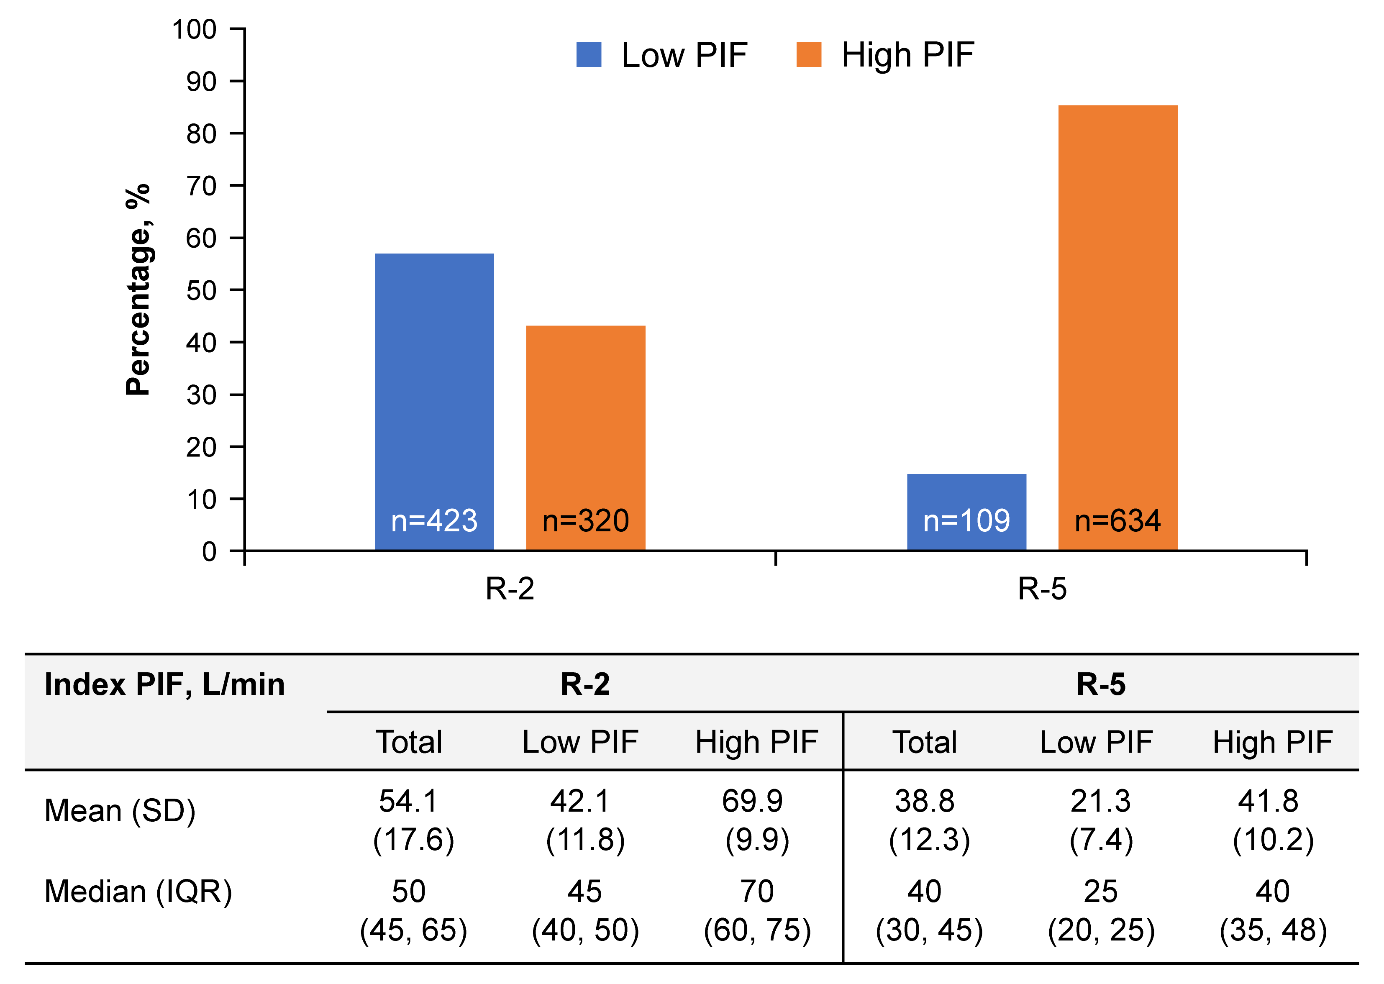


**Abbreviations:** IQR, interquartile range; PIF, peak inspiratory flow; R-2, medium-low resistance; R-5, high resistance; SD, standard deviation.
